1 **Title**

2 Practical and effective diagnosis of animal anthrax in endemic low-resource settings

3 **Short title**

4 Anthrax diagnostics in endemic low-resource areas

5 **Authors and Affiliations**

6 Olubunmi R. Aminu,<sup>a,b\*</sup> Tiziana Lembo,<sup>a</sup> Ruth N. Zadoks,<sup>a,1</sup> Roman Biek,<sup>a</sup> Suzanna

7 Lewis,<sup>c</sup> Ireen Kiwelu,<sup>d,e</sup> Blandina T. Mmbaga,<sup>d,e</sup> Deogratius Mshanga,<sup>f</sup> Gabriel Shirima,<sup>b</sup>

8 Matt Denwood,<sup>g</sup> and Taya L. Forde<sup>a</sup>

9

10 <sup>a</sup> Institute of Biodiversity, Animal Health and Comparative Medicine, University of Glasgow, Glasgow,  
11 United Kingdom

12 <sup>b</sup> Nelson Mandela African Institution of Science and Technology, Arusha, Tanzania

13 <sup>c</sup> Public Health England, Porton Down, Salisbury, United Kingdom

14 <sup>d</sup> Kilimanjaro Clinical Research Institute, Kilimanjaro Christian Medical Centre, Moshi, Tanzania

15 <sup>e</sup> Kilimanjaro Christian Medical University College, Moshi, Tanzania

16 <sup>f</sup> Tanzania Veterinary Laboratory Agency, Northern Zone, Arusha, Tanzania

17 <sup>g</sup> Department of Veterinary and Animal Sciences, University of Copenhagen, Copenhagen, Denmark

18 <sup>1</sup>Current address: Sydney School of Veterinary Science, University of Sydney, Sydney, Australia

19

20

21 \*Corresponding author

22 Email: [aminurhoda@gmail.com](mailto:aminurhoda@gmail.com)

## 23 **Abstract**

24 **Background:** Anthrax threatens human and animal health, and people's livelihoods in  
25 many rural communities in Africa and Asia. In these areas, anthrax surveillance is  
26 challenged by a lack of tools for on-site detection. Furthermore, cultural practices and  
27 infrastructure may affect sample availability and quality. Practical yet accurate diagnostic  
28 solutions are greatly needed to quantify anthrax impacts. We validated microscopic and  
29 molecular methods for the detection of *Bacillus anthracis* in field-collected blood smears  
30 and identified alternative samples suitable for anthrax confirmation in the absence of blood  
31 smears.

32 **Methodology/Principal Findings:** We investigated livestock mortalities suspected to be  
33 caused by anthrax in northern Tanzania. Field-prepared blood smears (n = 152) were tested  
34 by microscopy using four staining techniques as well as polymerase chain reaction (PCR)  
35 followed by Bayesian latent class analysis. Median sensitivity (91%, CI<sub>95%</sub> [84-96%]) and  
36 specificity (99%, CI<sub>95%</sub> [96-100%]) of microscopy using azure B were comparable to  
37 those of the recommended standard, polychrome methylene blue, PMB (92%, CI<sub>95%</sub> [84-  
38 97%] and 98%, CI<sub>95%</sub> [95-100%], respectively), but azure B is more available and  
39 convenient. Other commonly-used stains performed poorly. Blood smears could be  
40 obtained for <50% of suspected anthrax cases due to local customs and conditions.  
41 However, PCR on DNA extracts from dried skin, which was almost always available, had  
42 high sensitivity and specificity (95%, CI<sub>95%</sub> [90-98%] and 95%, CI<sub>95%</sub> [87-99%],  
43 respectively), even after extended storage at ambient temperature.

44 **Conclusions/Significance:** Azure B microscopy represents an accurate diagnostic test for  
45 animal anthrax that can be performed with basic laboratory infrastructure and in the field.  
46 When blood smears are unavailable, PCR using skin tissues provides a valuable alternative  
47 for confirmation. Our findings lead to a practical diagnostic approach for anthrax in low-  
48 resource settings that can support surveillance and control efforts for anthrax-endemic  
49 countries globally.

## 50 **Author summary**

51 Anthrax, an ancient disease largely controlled in the developed world, is still widespread in  
52 remote and rural communities of low- and middle-income countries where it affects human  
53 and animal health, and livelihoods. To control anthrax effectively, detection and accurate  
54 confirmation are important, but solutions need to be feasible for the most-affected areas

55 where resources and infrastructure are typically limited. To achieve this, we assessed a  
56 newly proposed stain, azure B, for microscopic confirmation on animal blood smears, as  
57 this method can be implemented in low-resource laboratories and in the field. Microscopy  
58 using azure B was highly accurate compared to other recommended stains and has the  
59 added advantage of being more readily available and convenient. However, blood smear  
60 samples were unavailable for more than half of suspected cases. We therefore evaluated a  
61 molecular test (PCR) on other sample types – whole blood, blood swabs, skin, and flies –  
62 stored at ambient temperature. We show high performance of PCR with skin tissues which  
63 were available for 90% of carcasses. Thus, under field conditions, smear samples (when  
64 available) and tissue samples are most suitable for diagnostic testing of animal anthrax,  
65 whereby microscopy can be conducted in affected areas and PCR in in-country reference  
66 laboratories.

## 67 **Introduction**

68 Zoonotic diseases have a dual and high burden on the health and livelihoods of people, in  
69 addition to their impact on animal health and welfare. The livelihoods of a majority of  
70 people living in developing countries depend on livestock farming, and it is estimated that  
71 about 80% of households in Africa derive all or part of their income from livestock  
72 keeping [1]. Therefore, the control of zoonotic diseases that cause human and animal ill-  
73 health – as well as losses to livelihoods – is important and highly relevant to achieving the  
74 sustainable development goals [2]. In contrast to emerging diseases, endemic zoonotic  
75 diseases like anthrax do not receive the attention needed to control them [3,4]. Anthrax is a  
76 bacterial disease caused by *Bacillus anthracis* and primarily affects herbivorous mammals,  
77 where it is characterised by sudden deaths in otherwise healthy animals.

78 In many parts of the developing world, underdiagnosis and misdiagnosis are important  
79 reasons for limited availability of data on the prevalence, incidence and impact of endemic  
80 diseases [3–5]. Confirmation of anthrax through detection of *B. anthracis* in an animal  
81 carcass can be achieved by examination of a stained blood smear, or by culture or  
82 polymerase chain reaction (PCR). Culture and (or) PCR is considered to be superior  
83 compared to microscopy [6], but requires infrastructure and consumables that few  
84 laboratories in developing countries have access to. For example, culture must be carried  
85 out in laboratory facilities equipped at biosafety level 2+ or ideally level 3, which are  
86 commonly lacking in areas where anthrax is endemic. Tests that perform highly on both  
87 scientific and convenience criteria are desirable; this is especially true in areas where

88 resources are scarce, and infrastructure is limited. Scientific criteria encompass the ability  
89 of a test to distinguish between subjects when the condition under investigation is truly  
90 present or absent, while convenience criteria are related to ease or practicality of  
91 implementing the test [7]. Convenience and scientific criteria are reflected in WHO's  
92 recommendation of ASSURED tests for developing countries (Affordable, Sensitive,  
93 Specific, User-friendly, Rapid and robust, Equipment free, and Deliverable to those who  
94 need it) [8]. WHO recommends culture and PCR as the methods of choice for confirmation  
95 of anthrax because of their high performance in terms of scientific criteria, but these  
96 methods are lacking in convenience criteria, particularly in the context of anthrax-endemic  
97 countries. In contrast, smear stain microscopy is a rapid and simple method for detecting *B.*  
98 *anthracis* requiring minimal equipment. It therefore holds great potential value as a field-  
99 friendly diagnostic method for anthrax confirmation in low-resource settings. Smear stain  
100 microscopy meets many of the ASSURED convenience criteria, however little is known  
101 about its performance against scientific criteria for the detection of *B. anthracis* for animal  
102 anthrax confirmation.

103 In 1903, M'Fadyean [9] established capsule staining with polychrome methylene blue  
104 (PMB) as a specific technique to detect *B. anthracis* and confirm anthrax. The capsule is a  
105 key component of *B. anthracis*' complex surface structure and contributes to the  
106 pathogenicity and virulence of the bacterium [10]. The capsule is a specific feature of *B.*  
107 *anthracis* and is not usually produced by closely related bacteria in the same genus such as  
108 *B. cereus* and *B. thuringensis* [11]. Although M'Fadyean PMB staining is the generally-  
109 accepted reference standard method for anthrax confirmation by microscopy, quality-  
110 controlled PMB has been difficult to obtain commercially since the successful control of  
111 anthrax in developed countries [12]. In addition, the stain requires at least 12 months to  
112 'age' in order to develop its metachromatic property, i.e. its ability to distinctly stain the  
113 capsule [12,13]. These limitations often prevent the rapid confirmation of anthrax in the  
114 field. One of the derivatives of PMB – azure B – has the potential to mitigate the  
115 limitations of PMB, as it is readily available and does not require maturation before use.  
116 The potential of azure B has been assessed under laboratory conditions on a limited  
117 number of smears prepared from isolates of *B. anthracis* from goats and mice [12], but no  
118 studies have assessed the stain directly on field samples obtained in endemic settings.

119 Smear samples are one of the easiest samples to collect and store. This makes them useful  
120 where infrastructure for cold chain storage is lacking. However, in areas where anthrax-  
121 suspect carcasses may be used by humans for food [14–16] or consumed by scavengers

122 [17,18], smear samples may be difficult to obtain for microscopy. PCR testing using other  
123 sample types provides an alternative when laboratory infrastructure is available in-country,  
124 although it may not meet some of the ASSURED criteria. For instance, it is more  
125 expensive, time consuming and requires more equipment and technical expertise than  
126 microscopy. Molecular detection of *B. anthracis* using PCR is a highly sensitive method to  
127 identify the pathogen [19]. However, for animal anthrax, PCR has largely been applied to  
128 DNA extracts from *B. anthracis* isolates [19,20], rather than field samples. Confirmation of  
129 anthrax from animal tissue samples has been reported using wildlife samples that had been  
130 stored in formaldehyde and cryopreserved in liquid nitrogen [21]. There have been no  
131 systematic studies to assess both sensitivity and specificity of PCR directly on various  
132 sample types, especially those that may be collected under typical field conditions. In  
133 addition, it is unknown whether PCR could be conducted on material from slides with  
134 stained blood smears, as histological stains may damage *B. anthracis* DNA or affect its  
135 integrity or quality, e.g. by intercalating between the genetic material.

136 Neither PCR nor microscopy are adjudged gold standard methods for the detection of *B.*  
137 *anthracis*. Therefore, it is important to determine their sensitivity and specificity if they are  
138 to be employed to improve the surveillance of anthrax in endemic and resource-poor areas.  
139 This study was aimed at testing and providing practical recommendations for the detection  
140 of *B. anthracis* from suspect animal carcasses in resource-poor endemic settings where  
141 culture is not feasible. To achieve this aim, our study objective were to 1) validate the  
142 newly proposed azure B staining technique for use on field samples by comparing its  
143 sensitivity and specificity to PMB and other routinely used stains; 2) assess the feasibility  
144 of using stained and unstained smears in PCR-based anthrax confirmation; and 3)  
145 determine the suitability of different sample types for molecular detection of *B. anthracis*  
146 using quantitative PCR (qPCR).

## 147 **Methods**

### 148 **Study area**

149 This study was carried out in the Ngorongoro Conservation Area (NCA) of northern  
150 Tanzania (Fig 1). The NCA covers an area of 8,292 km<sup>2</sup> and had 70,084 inhabitants in  
151 2012, with a population growth rate of 2.7% [22]. The major ethnic group in the study area  
152 are the Maasai who practise traditional nomadic pastoralism. The NCA is a multiple-use  
153 area where people and animals (including wildlife and livestock) co-exist and it typifies  
154 many rural settings in Africa and elsewhere in the world, including the multitude of risks  
155 and challenges to the control of neglected diseases. Some of the common characteristics of  
156 these settings include the remoteness of communities, the unavailability of well-developed  
157 infrastructure, and the co-existence of people and animals. Anthrax is present in the NCA  
158 [23], but data on incidence and its impacts on health and livelihoods are lacking.

159

160 **Fig 1. Tanzania, with the study area for evaluating anthrax diagnostic tools, the**  
161 **Ngorongoro Conservation Area (NCA), shown in grey. The NCA is a multiple land**  
162 **use area where people, livestock and wildlife live in close proximity and anthrax is**  
163 **endemic. Map was produced using data from Tanzania Bureau of Statistics.**  
164

### 165 **Research and ethical approvals**

166 The study received approval from the Kilimanjaro Christian Medical University College  
167 Ethics Review committee with certificate No. 2050, National Institute for Medical  
168 Research (NIMR), Tanzania, with Reference Number NIMRJHQ/R.8a/Vol. IX/2660;  
169 Tanzanian Commission for Science and Technology (COSTECH) number 2016-94-NA-  
170 2016-88; and College of Medical Veterinary and Life Sciences ethics committee at the  
171 University of Glasgow (application number 200150152). Approval and permission to  
172 access communities were also obtained from relevant local authorities. Verbal and/or  
173 written informed consent was obtained from all owners of livestock sampled, with verbal  
174 consent obtained in lieu of written consent where participants were unable to write. Both  
175 verbal and written consent had been approved by the ethical committees.

## 176 **Field-based surveillance and sampling**

177 We set up a field-based active surveillance system within the NCA to investigate deaths in  
178 livestock reported by community members as suspected to be caused by anthrax, and to  
179 obtain samples for disease confirmation based on the identification of *B. anthracis*.  
180 Twenty-five local animal health professionals including community animal health workers  
181 (CAHWs) and livestock field officers (LFOs) were trained to respond to reports of anthrax  
182 cases in the NCA and to collect samples for confirmation. Suspected cases of anthrax in  
183 animals were defined as the occurrence of sudden death in previously healthy-looking  
184 animals, possibly with associated signs such as blood oozing from the natural orifices and  
185 the rapid swelling and decomposition of carcasses. The professionals received sampling  
186 kits containing materials for sample collection and personal protective equipment (PPE).  
187 Each kit contained primary containers (30 ml Sterilin containers for tissues, soil, flies and  
188 swabs, or 5 ml blood tubes for whole blood), secondary containers (Ziplock bags), in  
189 addition to slides for blood smear samples, a disposable scalpel and a pair of disposable  
190 forceps. The PPE included two pairs of gloves, a face mask, over-sleeves and cover boots,  
191 and chlorine release tablets (to be dissolved in water to obtain approximately 10,000 ppm  
192 chlorine solution) for decontamination.

193 Unless otherwise stated, all individual samples were collected into primary containers, then  
194 sealed within secondary Ziplock bags. Five sample types were obtained. Firstly, blood  
195 smear samples were collected from anthrax-suspect carcasses when blood was available  
196 for smearing. In the field at the site of the carcass, blood was smeared onto a slide using a  
197 second slide (up to 6 per carcass). Smears were air dried, and slides were carefully  
198 wrapped in paper towel and sealed in primary Ziplock bags. Secondly, when available,  
199 whole blood was collected using needle-free syringes, transferred into blood tubes with no  
200 anticoagulant, and wrapped in paper towel and sealed in a secondary container. Thirdly,  
201 swab samples were taken by inserting a cotton swab into available blood or fluids from a  
202 carcass. Fourthly, depending on the state of the animal remains, tissue was collected from  
203 the tip of the ear (if the carcass was still intact) or other available pieces of skin (if they had  
204 been butchered or scavenged) (Fig 2). Skin was collected using disposable scalpel and  
205 forceps. Finally, flies on and around carcasses and areas where the animals had been  
206 butchered or scavenged were collected into tubes. All sample types from a single carcass  
207 were packaged in a larger tertiary Ziplock bag and stored at ambient temperature (15°C to  
208 47°C in the NCA) prior to transporting to the Kilimanjaro Clinical Research Institute

209 (KCRI) laboratory in Moshi, Tanzania, for testing. Samples were stored at ambient  
210 temperature for up to six months before testing.

211

212 **Fig 2. Examples of suspected *Bacillus anthracis*-infected carcasses sampled as**  
213 **part of a field-based surveillance scheme in northern Tanzania. Blood smear, whole**  
214 **blood, blood swab and skin were obtainable from a) whereas only skin could be**  
215 **obtained from b).**

216

### 217 **Microscopy testing**

218 For each carcass sampled between June 2016 and November 2017 (n=152), three stains  
219 (azure B, Giemsa and Rapi-Diff II) were applied to smear samples (one stain per sample).  
220 PMB staining was carried out on a smaller number of samples (n=102) due to smear  
221 sample unavailability. One positive control slide obtained from the Rare and Imported  
222 Pathogens Laboratory (RIPL), Public Health England (PHE), was included in each staining  
223 batch of up to 12 slides. The control slides consisted of smears of *B. anthracis* isolated  
224 from pure culture, fixed in formalin and heat inactivated as per standard procedures carried  
225 out by PHE. The staining procedures are outlined in S 1 File.

226 Stained slides were examined using a light microscope (magnification 1000x), in random  
227 order with respect to the staining technique. Smears were considered positive if blue or  
228 purple square-ended rods were observed surrounded by a pink or pinkish-red capsule or  
229 'shadon', a remnant of capsular material [24] (S 1 Fig). A slightly modified protocol, based  
230 on [12], was used to define the quality and strength of capsule presence based on the  
231 metachromatic property of the stains and the ability to clearly demarcate the capsule from  
232 the cells. Scores were assigned to each slide based on the chart shown in S 1 Fig.

233 **Inter-observer and inter-laboratory comparison.** To measure inter-observer variability,  
234 which might affect the utility of the test in non-specialist settings, comparisons of slide  
235 readings made by multiple observers were carried out. Firstly, a batch of slides stained by  
236 one person was viewed and interpreted by two observers. This was carried out on slides  
237 that were used to assess the performance of the four stains. Secondly, for azure B only, the  
238 two people independently stained and read slides made from the same animal cases (n =  
239 71).



240 For a subset of suspected anthrax cases, additional blood smear samples (n=66) were  
241 assessed independently by the Tanzania Veterinary Laboratory Agency (TVLA) zonal  
242 veterinary centre in Arusha, Tanzania, which is responsible for veterinary diagnostic  
243 services within the study region. Here, smears were processed by laboratory personnel  
244 following their routinely used protocol with PMB stain, prepared at the TVLA and aged  
245 for 4 years. This procedure is hereafter referred to as the TVLA technique.

#### 246 **DNA extraction and quantitative PCR testing**

247 All procedures related to sample aliquoting and DNA extraction were carried out in a class  
248 2 biosafety cabinet at a biocontainment level 3 facility at KCRI. Sterile filter pipette tips  
249 were used throughout all extractions.

250 **DNA extraction.** DNA extraction was conducted using the Qiagen DNeasy Blood &  
251 Tissue Kit (Qiagen, Germany) spin column protocol, with initial sample preparation  
252 conducted as outlined below.

253 Smear scrapings were collected in a 1.5 ml microcentrifuge tube. After this, 200 µl PBS  
254 and 20 µl of 20 mg/ml proteinase K were added to the tubes. For blood samples, 20 µl  
255 proteinase K was pipetted into a 1.5mL microcentrifuge tube. A 100µl aliquot of the blood  
256 sample was transferred into the tube containing proteinase K, and the solution adjusted to  
257 220 µl by adding 100 µl of phosphate buffered saline (PBS). For swabs, the sampled end  
258 was cut off and placed into a 1.5mL microcentrifuge tube and soaked in 200µl PBS with  
259 20µl proteinase K. The mixture was incubated at ambient temperature for at least one hour,  
260 vortexing the tubes mid-way and after incubation. For skin, a portion (50 mg) was cut into  
261 small pieces of approximately 2 mm<sup>3</sup> in a petri dish using a sterile scalpel and transferred  
262 into a 2 ml MagNA Lyser bead tube (Roche, United Kingdom). Following this, 360µl  
263 tissue lysis buffer (ATL buffer, included in the Qiagen kit) was added to each tube and the  
264 sample was bead beaten four times at 5000 rpm for 18 seconds in a Precellys tissue  
265 homogeniser (Bertin, France). Proteinase K (40 µl) was added to the mixture and left to  
266 incubate at 56 °C for 6 to 8 hours or overnight until complete tissue lysis was achieved.  
267 For flies, about 100 mg (between 1 and 3 individuals) were transferred into a 2 ml MagNA  
268 Lyser bead tube and 360 µl of PBS was added. The sample was bead beaten four times at  
269 5000 rpm for 18 seconds in a Precellys tissue homogeniser and 200 µl of the homogenised  
270 sample was transferred into a microcentrifuge tube with 20 µl of proteinase K added. For  
271 all these sample types, the supernatant (220 µl) was transferred to a new microcentrifuge

272 tube and the DNeasy Blood & Tissue Kit spin column protocol was completed according  
273 to the manufacturer's protocol. No-template controls (NTCs) were included in each  
274 extraction by taking only reagents through the extraction process. All DNA extracts were  
275 stored at -20 °C prior to use in PCR. The fly species were not determined prior DNA  
276 extraction.

277 **qPCR.** Quantitative PCR was carried out on all DNA extracts. Taqman (hydrolysis) probe-  
278 based assays were carried out on the Rotor-Gene Q platform (Qiagen), targeting one  
279 chromosomal sequence (*PLF3*) [19] and two plasmid targets, *cap* (pXO2) and *lef* (pXO1).  
280 Primer and probe sequences for the plasmid targets were obtained from RIPL, PHE.  
281 Details are available as supplementary materials in S 3 Table.

282 Master mix was prepared as follows: 10 µl 2X PrimeTime<sup>®</sup> Gene Expression Master Mix  
283 (IDT, Belgium), 10µM primers and probes (volumes according to S 3 Table) and made up  
284 to 18µl per reaction with nuclease free water. The mixture was vortexed and centrifuged  
285 briefly. Master mix was added to each qPCR tube and 2 µl of the template DNA was added  
286 for a total reaction volume of 20 µl. Negative and positive qPCR controls for each target  
287 were included in each run. The cycling conditions were as follows: (1)  
288 activation/denaturation at 95 °C for 3 minutes, and (2) amplification, using 40 cycles of 60  
289 °C for 35 seconds and 95 °C for 5 seconds.

290 **qPCR on DNA extracts from stained smears.** For 15 carcasses testing positive for *B.*  
291 *anthracis* by microscopy and qPCR (based on material from unstained slides), DNA was  
292 extracted from each of the 4 stained slides to test whether staining interferes with the qPCR  
293 process. The smear from each slide was scraped off, the DNA was extracted, and qPCR  
294 conducted as described above. Primers and probes for only the chromosomal target were  
295 used in the qPCR reaction. The cycle threshold (Ct) values for stained smear samples were  
296 compared to values for unstained samples. For each stain, 2 PHE controls were included.

### 297 **Estimating test sensitivity and specificity**

298 Analyses for estimating the sensitivity and specificity of the tests were conducted assuming  
299 the unavailability of a gold standard test by employing latent class analyses [7] within a  
300 Bayesian framework. A Latent Class Model (LCM) was applied assuming two latent  
301 classes for each of the anthrax-suspect cases studied – anthrax true positive and anthrax  
302 true negative carcasses. The LCM formulation that we used is equivalent to an extension of

303 the standard Hui Walter model [25], but our formulation is more similar to that of a state  
304 space model where there is a formal separation of the observation layer and the underlying  
305 process layer. This type of model can also be considered a generalised form of a mixture  
306 model in which the latent classes are related to each other in some way rather than being  
307 independent [26]. The analysis used test results from the four different staining techniques  
308 and qPCR carried out on blood smear, whole blood, blood swab, and skin tissue samples.  
309 A breakdown of the data informing the LCM is shown in S 2 Fig.

310 The latent class model estimated the true but latent disease status of each sampled animal  
311 as a Bernoulli distribution based on the prevalence of *B. anthracis* within the population of  
312 carcasses. This depended on the underlying process (i.e. the presence of capsule or DNA  
313 within a sample from an animal infected with *B. anthracis*), which was modelled as a  
314 second latent process conditional on the true disease status of the corresponding animal,  
315 and the observation process (i.e. the test ability to detect the DNA or capsules in the  
316 sample as observed in the PCR and microscopy test results). Minimally informative priors  
317 were imposed on the model for the prevalence of *B. anthracis* as no relevant published  
318 studies on the prevalence of anthrax (i.e. the proportion of sudden deaths attributable to  
319 anthrax) in livestock in Tanzania are available. The prior for prevalence was a Beta (1, 1)  
320 distribution. Minimally informative priors were also used for the probability of observing a  
321 capsule if present (independent of the stain used), the sensitivities of the four staining  
322 techniques, the probability of detecting DNA if present, and the sensitivity of the PCR test.  
323 Each of those priors was set to Beta (1, 1).

324 Much more informative priors were imposed on the model for the specificities of the four  
325 staining techniques. This assumed that observing a capsule on a bacillus or chain of bacilli  
326 in a sample from a suspected anthrax case was very specific for *B. anthracis*, so the  
327 specificities of the test based on this criterion should be high. Thus, (Beta (50, 1))  
328 indicating specificities between 92% to 100% was used as prior for each of the four  
329 staining techniques. For the specificity of PCR, a prior indicating specificity between 92%  
330 to 100% (Beta (50, 1)) was also applied to the model. For the underlying processes  
331 implying that the presence of the DNA targets and capsule indicate *B. anthracis* infection,  
332 priors were Beta (371, 1) and Beta (50, 1) respectively.

333 The model was fitted using Markov chain Monte Carlo (MCMC) methods implemented  
334 using JAGS [27], called from R, version 3.6.0 [28] using the runjags package [29] as an  
335 interface. For the model, two MCMC chains each with 20,000 iterations were run.

336 Convergence in the models was assessed visually from the plots generated, as well as from  
337 the potential scale reduction factor (psrf) of the Gelman Rubin statistic. Adequate sample  
338 size was confirmed using the effective sample size (i.e. > 400) of the resulting chains.

339 Microscopy results as well as qPCR data were treated as binary data, with 0 representing  
340 negative results and 1 representing positive results, and were modelled as discrete  
341 variables. At the time of the qPCR testing, cut-off Ct values were determined based on the  
342 results of the NTCs. A conservative cut-off value was set at 36 cycles and this cut-off was  
343 applied across all three targets to ensure that amplification artefacts such as small-scale  
344 cross-contamination or the degradation of probes did not interfere with the qPCR [30].  
345 Samples with Ct values  $\leq 36$  were designated positive for the respective target, while those  
346 with Ct values  $> 36$  or no amplification were considered negative. In the one instance  
347 where amplification of a NTC occurred (Ct value of 37 for target *cap*), the Ct cut-off value  
348 was adjusted to 35 for any samples in the same extraction batch. Samples in which all three  
349 targets amplified below the cut-off were considered positive for *B. anthracis*. The  
350 maximum Ct value of the three values obtained for the different genetic targets was chosen  
351 to represent the Ct value for the respective sample. Results of NTCs were also included in  
352 the model, as they provide a form of prior information for the model (true negatives for *B.*  
353 *anthracis*).

354 The sensitivity and specificity of qPCR were obtained in two ways. In the first, they were  
355 derived from the model using a Ct cut-off value of 36. In the second, sensitivity and  
356 specificity were estimated by optimising the Ct cut-off. Optimising the balance between  
357 sensitivity and specificity yields a threshold for which the total highest sensitivity and  
358 specificity are obtained [31].

359 In assessing the agreement (or disagreement) between different observers, Kappa statistics  
360 were used to measure inter-observer agreement and to quantify the consistency of the  
361 agreement observed [32]. Kappa statistics for inter-observer agreement, the agreement  
362 between the TVLA technique and azure B as well as PMB stain microscopy were  
363 computed using the irr package [33] in R version 3.6.0 [30] (S 2 File).

## 364 Results

365 Through the field surveillance platform, 367 suspected anthrax cases were investigated.  
366 Blood smears, whole blood, blood swabs and flies were available from 152 (41%), 102  
367 (28%), 138 (38%) and 30 (8%) carcasses, respectively. By contrast, skin samples could be  
368 obtained from the vast majority of carcasses (n = 325 or 89%).

369 The majority of cases were sheep (67.3%), followed by goats and cattle (ca. 10% each; S 1  
370 Table) and donkeys (4.4%). Non-livestock species included *Giraffa camelopardalis*  
371 (giraffe), *Connochaetes taurinus* (wildebeest), *Equus burchellii* (zebra) and *Loxodonta*  
372 *africana* (elephant), while species identity could not be established for 22 suspected cases.  
373 The majority of carcasses (80%) had been opened prior to the diagnostic investigation.

## 374 Microscopy

375 The majority (100/152, 65.8%) of the smear samples were collected less than 24 hours  
376 after the death of the animal, while > 98% were collected within a week. The proportion of  
377 positives, based on the detection of capsule was higher with PMB or azure B stains than  
378 with Giemsa or Rapi-Diff II (Table 1 and S 2 Table).

379 **Table 1: Detection of *Bacillus anthracis* among samples from 152 suspected**  
380 **anthrax cases evaluated with three stains and a subset of 102 cases evaluated with**  
381 **four stains. PMB = polychrome methylene blue.**  
382

| Technique | Positives out of 152<br>number (%) | Positives out of 102<br>number (%) |
|-----------|------------------------------------|------------------------------------|
| qPCR      | 90 (59.2%)                         | 69 (67.6%)                         |
| PMB       | N/A                                | 62 (60.8%)                         |
| Azure B   | 81 (53.3%)                         | 62 (60.8%)                         |
| Giemsa    | 14 (9.9%)                          | 11 (10.8%)                         |
| Rapi-Diff | 15 (9.9%)                          | 12 (11.8%)                         |

383

384 Microscopy using PMB or azure B had high sensitivity and specificity. In contrast, staining  
385 with Giemsa or Rapid Diff II gave poor sensitivity (Table 2).

386 **Table 2. Estimated sensitivity and specificity of microscopy techniques for**  
387 **detection of *Bacillus anthracis* in blood smears, using a latent class model (LCM),**  
388 **assuming no reference standard. PMB = polychrome methylene blue.**

| Stain                | Median sensitivity (95% confidence intervals) | Median specificity (95% confidence intervals) |
|----------------------|-----------------------------------------------|-----------------------------------------------|
| Azure B (n=152)      | 90.8% (83.9 – 96.4%)                          | 98.5% (96.0 – 100.0%)                         |
| PMB (n=102)          | 91.6% (84.3 – 97.3%)                          | 98.3% (95.3 – 100.0%)                         |
| Giemsa (n=152)       | 16.2% (9.2 – 24.0%)                           | 99.2% (97.2 – 100.0%)                         |
| Rapi-Diff II (n=152) | 17.5% (10.3 – 25.5%)                          | 99.2% (97.3 – 100.0%)                         |

389

390 The LCM allowed the estimation of the sensitivity and specificity of the staining tests as  
391 well as the prevalence of anthrax in the samples. The overall prevalence of *B. anthracis* in  
392 the samples was estimated to be 68% (95% CI: 62-73%).

393 Inter-observer agreement was nearly perfect for azure B and PMB (PABAK scores of 0.94  
394 and 0.95 respectively, with 1.0 representing perfect agreement) when both observers  
395 evaluated the same slide. Likewise, when different slides were stained and observed  
396 separately, inter-observer agreement was near perfect for azure B with a PABAK score of  
397 0.94 (S 2 File).

398 **Quantitative PCR**

399 **Detection of *B. anthracis* in different sample types.** Overall, 61% of samples (457/747)  
400 tested positive based on DNA amplification of the three targets at Ct  $\leq$  36. The majority  
401 (90%) of samples in which at least one target was detected showed successful  
402 amplification of the other two targets as well (Table 3).

403 **Table 3. Number (and percentage) of anthrax-suspected samples with detection of**  
404 **none, one, two, or all three DNA targets at a qPCR cycle threshold  $\leq$ 36.**  
405

| Sample type           | Number of targets amplified |          |          |            |
|-----------------------|-----------------------------|----------|----------|------------|
|                       | 0                           | 1        | 2        | 3          |
| Blood smear (n=152)   | 57 (37.5)                   | 2 (1.3)  | 4 (2.6)  | 89 (58.6)  |
| Whole blood (n=102)   | 37 (36.3)                   | 5 (4.9)  | 1 (0.1)  | 59 (57.8)  |
| Blood swab (n=138)    | 41 (29.7)                   | 5(3.6)   | 7 (5.1)  | 83 (60.1)  |
| Skin (n=325)          | 82 (25.2)                   | 15 (4.6) | 5 (1.5)  | 223 (68.6) |
| Flies (n=30)          | 20 (66.7)                   | 4(13.3)  | 3 (10.0) | 3 (10.0)   |
| Total samples (n=747) | 237 (31.7)                  | 31 (4.1) | 20 (2.7) | 457 (61.2) |

406

407 For almost all sample types, the sensitivity and specificity of qPCR were very high (87.0%  
408 - 98.6%) at the optimal sample-specific threshold (Table 4). The only exception was fly  
409 samples, which only had a sensitivity of 19.2%.

410

411 **Table 4. Optimal cycle threshold (Ct) cut-off values and corresponding sensitivity and specificity for detecting *B. anthracis* with quantitative**  
 412 **polymerase chain reaction (qPCR) in sample materials from the field and the associated sensitivity and specificity.**

| Sample material | Number of samples available | Median sensitivity at Ct cut-off of 36 (95% confidence intervals) | Median specificity at Ct cut-off of 36 (95% confidence intervals) | Optimal threshold | Median sensitivity at optimal threshold (95% confidence intervals) | Median specificity at optimal threshold (95% confidence intervals) |
|-----------------|-----------------------------|-------------------------------------------------------------------|-------------------------------------------------------------------|-------------------|--------------------------------------------------------------------|--------------------------------------------------------------------|
| Blood smear     | 152                         | 97.8% (93.0-99.7%)                                                | 95.1% (87.0-98.9%)                                                | 32                | 96.2% (90.3-99.2%)                                                 | 98.6% (93.2-99.9%)                                                 |
| Whole blood     | 102                         | 87.0% (77.4-93.9%)                                                | 89.3% (77.2-96.2%)                                                | 39                | 93.4% (85.6-97.9%)                                                 | 87.0% (74.4-94.9%)                                                 |
| Blood swab      | 138                         | 87.0% (78.6-93.1%)                                                | 93.2% (84.2-98.2%)                                                | 37                | 89.2% (81.3-94.5%)                                                 | 92.5% (82.4-98.0%)                                                 |
| Skin            | 325                         | 93.6% (88.9-96.8%)                                                | 94.4% (86.3-98.8%)                                                | 37                | 94.7% (90.2-97.9%)                                                 | 94.7% (87.0-98.9%)                                                 |
| Flies           | 30                          | 19.2% (5.1-42.2%)                                                 | 93.5% (73.2-99.8%)                                                | 36                | 19.2% (5.1-42.2%)                                                  | 93.5% (73.2-99.8%)                                                 |

413

414



415 **Assessing the possibility of stained smears as starting materials for PCR.** DNA  
416 extracts from unstained blood smears from confirmed anthrax cases (n = 15) had lower  
417 average Ct values (23.76 +/- 4.85) than those from smears stained with azure B, PMB,  
418 Giemsa or Rapi-Diff II (25.82 +/- 4.45, 26.71 +/- 4.81, 28.50 +/- 5.45 and 26.64 +/- 5.01,  
419 respectively). Four of the positive controls (one per stain), which had been pre-treated with  
420 formalin, showed no amplification.

## 421 Discussion

422 Our study demonstrates that microscopy on field-prepared blood smears from suspected  
423 anthrax-affected animal carcasses from endemic areas using Azure B staining yields very  
424 high sensitivity and optimal specificity. This technique largely outperforms other stains  
425 (Giemsa or Rapi-Diff II) commonly found in laboratories in endemic areas and is  
426 advantageous compared to the gold standard stain – Polychrome Methylene Blue (PMB) –  
427 because it can be used immediately after preparation (in comparison to PMB, which  
428 requires at least a year of maturation). Azure B staining is also robust, with good  
429 consistency of results between users. However, given that in many anthrax-endemic areas  
430 carcasses are either consumed or scavenged, blood is often not available for diagnostic  
431 confirmation by microscopy. In our study, tissue samples, particularly skin samples, were  
432 commonly available from suspect carcasses. We show that these samples enable pathogen  
433 detection with high sensitivity and specificity, even when stored for up to several months  
434 at ambient temperature. This sample type can therefore offer a good alternative when  
435 microscopy is not possible. These practical solutions will be of considerable value to the  
436 surveillance and control of anthrax in other high-risk areas that face similar challenges.

437  
438 Our results demonstrate that Azure B provides a user-friendly alternative to the officially  
439 recommended PMB stain for microscopic detection of *B. anthracis*, matching it on  
440 scientific criteria (sensitivity, specificity, and inter-observer agreement) and out-  
441 performing it on convenience criteria. Smear stain microscopy using Azure B fulfils most  
442 of the ASSURED criteria. Microscopy is more affordable, user friendly and rapid than  
443 culture or PCR; however, deliverability of microscopy under field conditions can be  
444 hampered by the limited availability of the officially recommended PMB stain. This  
445 limitation is overcome by Azure B, which is commercially available and convenient to  
446 prepare and use because it does not require aging. Inter-observer agreements for both Azure  
447 B and PMB indicated that the tests are robust to variability that could occur among  
448 multiple observers, including when staining was performed by different individuals, or  
449 even laboratories. Thus, Azure B is a suitable alternative stain to PMB with major  
450 advantages for the detection of *B. anthracis* in blood smear samples from the field. In  
451 contrast, the sensitivities of Giemsa and Rapi-Diff II for detecting the capsule of *B.*  
452 *anthracis* were poor and their use should be discouraged for anthrax confirmation.

453 One major limitation of smear stain microscopy is the need for access to blood samples. In  
454 many affected areas in Africa and Asia, anthrax carcasses are consumed by the local

455 population [14–16] or by scavengers [17,18], limiting the availability of fresh samples for  
456 diagnostic testing, as confirmed by our findings. This also limits the value of other  
457 promising rapid tests, such as lateral flow tests conducted on blood samples [34]. Out of  
458 the total number of suspected cases investigated, we could only obtain blood smears for  
459 41%. Therefore, alternative sample materials and diagnostic methods must be considered  
460 for anthrax surveillance in endemic areas. Alternative diagnostic methods include culture  
461 and PCR, neither of which would be ASSURED at field level. However, both culture and  
462 PCR are considered sensitive and specific, and the requisite facilities and equipment may  
463 be available at national level. Because of the need for higher containment facilities when  
464 conducting culture of *B. anthracis*, PCR is more user-friendly. Comparisons between the  
465 two methods were not conducted as part of the current study due to the lack of local  
466 capacity for *B. anthracis* culture. Rather, we focussed on the robustness of PCR to field  
467 conditions (lack of cold chain) and on its ability to deliver results from the available  
468 sample types.

469 The convenience criteria we aimed to maximise were those of sample availability, while  
470 assessing the suitability of sample storage at ambient temperature to overcome the lack of  
471 storage infrastructure in field conditions characteristic of endemic and remote communities  
472 in low income countries. Skin tissue was available in the majority of cases (89%), and  
473 from twice as many suspected anthrax cases as blood smears. The high sensitivity and  
474 specificity of qPCR using skin samples indicates that the collection of this sample material  
475 from suspect animal carcasses has the potential to radically improve anthrax surveillance in  
476 endemic settings. PCR using whole blood or swab samples had lower sensitivity and  
477 specificity than smear and skin tissue samples, and these sample types suffered from the  
478 same challenges of limited availability as described for blood smears; as such, these  
479 sample types have minimal utility for routine anthrax surveillance compared to blood  
480 smears or skin tissues.

481 We found that it is not only possible to detect *B. anthracis* from samples stored at ambient  
482 temperature for up to six months, but that the pathogen can be detected with high  
483 specificity and sensitivity. The ability of *B. anthracis* to form spores may be responsible  
484 for this observation, since the DNA sequestered in spores is protected from damage. No  
485 comparisons were made between the outcomes (i.e. sensitivity and specificity) of qPCR for  
486 samples stored at ambient temperature and those stored using cold chain. Notwithstanding,  
487 the diagnostic results were similar to those obtained using stain microscopy, which is based  
488 on a different method of pathogen detection (DNA vs presence of capsule). This suggests

489 that sample storage at ambient temperature is unlikely to have a major impact on the  
490 detection of *B. anthracis*.

491 The poor sensitivity of qPCR for detecting *B. anthracis* from fly samples indicates that  
492 they are not useful diagnostic materials, at least in the kind of environments our study was  
493 conducted in. The analysis of fly samples has been shown to provide insights into the  
494 epidemiology of anthrax in areas where carcasses are even more challenging to find and  
495 sample. Hoffmann *et al.* [35] were able to detect the DNA of anthrax-causing *B. cereus* in  
496 fly samples, which allowed them to better define the geographical distribution of this  
497 pathogen in dense tropical forests in West Africa. DNA was detected in only 5% of the 784  
498 fly samples tested in that study; given the low sensitivity of qPCR we estimated with fly  
499 samples, the true prevalence of anthrax could be much higher than what Hoffmann *et al.*  
500 reported [35].

501 Where blood smears can be taken from suspected anthrax cases, microscopy using azure B  
502 stained slides should be the method of choice for case confirmation. Furthermore, we  
503 found that stained smear samples can also be used reliably for PCR detection. This could  
504 be useful in retrospective studies or for molecular investigation of confirmed anthrax cases.  
505 However, fixation of blood smears with formalin, which crosslinks and damages DNA,  
506 reduced the sensitivity of the qPCR assay, as suggested by previous studies [36]. By  
507 contrast, use of azure B, PMB, Giemsa or Rapi-diff II does not preclude the use of PCR,  
508 although the sensitivity of detection is also slightly reduced. PCR testing on stained smears  
509 may not only be useful for the confirmation on anthrax, but may have potential use for  
510 strain typing e.g. identifying canonical single nucleotide polymorphisms (SNPs) in the *B.*  
511 *anthracis* genome [37].

## 512 **Conclusion**

513 This study, conducted in field conditions in an anthrax-endemic area, has shown that  
514 microscopy using azure B in place of PMB is highly sensitive and specific for detecting *B.*  
515 *anthracis* in blood smears from animal carcasses, and more user-friendly because of the  
516 availability of azure B. However, tissue samples were more readily available from  
517 carcasses than blood smears and *B. anthracis* was detected from them with high sensitivity  
518 and specificity using PCR. In the event of a suspected anthrax case in an animal, smear  
519 samples (when available) for use in microscopy and PCR, and skin tissues for PCR are  
520 most likely to yield accurate diagnostic results for anthrax surveillance in endemic areas

521 where the lack of infrastructure impedes cold chain storage. We propose practical and  
522 feasible solutions to the widely recognised challenges of anthrax surveillance in the most  
523 affected areas. Our approaches will therefore be of value to a range of endemic contexts by  
524 providing insights into disease occurrence that can be used to inform human and animal  
525 health policy and targeted anthrax control efforts.

## 526 **Acknowledgements**

527 We are grateful for all the support received for this research, including from the NCA  
528 community. We thank the Ngorongoro District Council (District Veterinary Officer and  
529 District Medical Officer), Ngorongoro Conservation Area Authority (NCAA), Tanzania  
530 Wildlife Research Institute (TAWIRI) and members of our field team - Sabore Ole Moko,  
531 Sironga Nanjicho, Alutu Masokoto, Godwin Mshumba, Kadogo Lerimba and Paulo  
532 Makutian. We are also grateful to the Directorate of Veterinary Services, Ministry of  
533 Agriculture, Livestock and Fisheries, and Ministry of Health, Community Development,  
534 Gender, Elderly and Children. We thank Daniel Bailey of Public Health England,  
535 Salisbury for sharing *cap* and *lef* primer sequences. We are grateful to Richard Reeve of  
536 the Boyd Orr Centre for Population and Ecosystem Health, University of Glasgow for  
537 useful discussions on improving the statistical analysis.

## 538 **References**

- 539 1. Krätli S, Huelsebusch C, Brooks S, Kaufmann B. Pastoralism: A critical asset for  
540 food security under global climate change. *Anim Front.* 2013;3(1):42–50.
- 541 2. Swaminathan MS, Kesavan PC. Achieving the sustainable development goals.  
542 *Current Science* [Internet]. 2016 [cited 2019 Aug 7];110(2):127–8. Available from:  
543 <https://www.un.org/sustainabledevelopment/development-agenda/>
- 544 3. Molyneux D, Hallaj Z, Keusch G. Zoonoses and marginalised infectious diseases of  
545 poverty: where do we stand. *Parasites and vectors.* 2011;4(1):106.
- 546 4. Maudlin I, Eisler MC, Welburn SC. Neglected and endemic zoonoses. *Philos Trans*  
547 *R Soc Lond B Biol Sci.* 2009 Sep 27;364(1530):2777–87.
- 548 5. World Health Organization. The control of neglected zoonotic diseases □:  
549 community based interventions for NZDs prevention and control. Geneva: WHO;

- 550 2010.
- 551 6. WHO. Anthrax in humans and animals [Internet]. 2008 [cited 2016 Jan 7].  
552 Available from:  
553 <https://www.who.int/csr/resources/publications/AnthraxGuidelines2008/en/>
- 554 7. Reitsma JB, Rutjes AWS, Khan KS, Coomarasamy A, Bossuyt PM. A review of  
555 solutions for diagnostic accuracy studies with an imperfect or missing reference  
556 standard. *J Clin Epidemiol*. 2009;62(8):797–806.
- 557 8. Mabey D, Peeling RW, Ustianowski A, Perkins MD. Diagnostics for the developing  
558 world. *Nat Rev Microbiol*. 2004;2(3):231–40.
- 559 9. M’Fadyean J. A peculiar staining reaction of the blood of animals dead of anthrax. *J*  
560 *Comp Pathol Ther* [Internet]. 1903 Jan [cited 2015 Oct 28];15:35-IN1. Available  
561 from: <http://www.sciencedirect.com/science/article/pii/S0368174203800061>
- 562 10. Mock M, Fouet A. Anthrax. *Annu Rev Microbiol*. 2001;55(1):647–671.
- 563 11. Vilas-Bôas GT, Peruca APS, Arantes OMN. Biology and taxonomy of *Bacillus*  
564 *cereus*, *Bacillus anthracis*, and *Bacillus thuringiensis*. *Can J Microbiol*.  
565 2007;53(6):673–87.
- 566 12. Owen MP, Schauwers W, Hugh-Jones ME, Kiernan JA, Turnbull PCB, Beyer W. A  
567 simple, reliable M’Fadyean stain for visualizing the *Bacillus anthracis* capsule. *J*  
568 *Microbiol Methods*. 2013 Mar;92(3):264–9.
- 569 13. Forshaw D, Higgs A, Moir D, Ellis T, Links I. Anthrax in cattle in southern Western  
570 Australia. *Aust Vet J* [Internet]. 1996 Nov [cited 2015 Oct 28];74(5):391–3.  
571 Available from: <http://doi.wiley.com/10.1111/j.1751-0813.1996.tb15453.x>
- 572 14. Gombe N., Nkomo BMM, Chadambuka A, Shambira G, Tshimanga M. Risk factors  
573 for contracting anthrax in Kuwirirana ward, Gokwe North, Zimbabwe. *Afr Health*  
574 *Sci*. 2010;10(2):159–64.
- 575 15. Sitali DC, Mumba C, Skjerve E, Mweemba O, Kabonesa C, Mwinyi MO, et al.  
576 Awareness and attitudes towards anthrax and meat consumption practices among

- 577 affected communities in Zambia: A mixed methods approach. *PLoS Negl Trop Dis*.  
578 2017;11(5):p.e0005580.
- 579 16. Biswas PK, Islam MZ, Shil SK, Chakraborty RK, Ahmed SSU, Christensen JP.  
580 Risk factors associated with anthrax in cattle on smallholdings. *Epidemiol Infect*.  
581 2012;140(10):1888–95.
- 582 17. Dragon DC, Bader DE, Mitchell J, Woollen N. Natural dissemination of *Bacillus*  
583 *anthracis* spores in Northern Canada. *Appl Environ Microbiol*. 2005;71(3):1610–5.
- 584 18. Beyer W, Turnbull PCB. Anthrax in animals. *Mol Aspects Med*. 2009;30(6):481–9.
- 585 19. Wielinga PR, Hamidjaja RA, Ågren J, Knutsson R, Segerman B, Fricker M, et al. A  
586 multiplex real-time PCR for identifying and differentiating *Bacillus anthracis*  
587 virulent types. *Int J Food Microbiol*. 2011;145(SUPPL. 1):S137-S144.
- 588 20. Ellerbrok H, Nattermann H, Özel M, Beutin L, Appel B, Pauli G. Rapid and  
589 sensitive identification of pathogenic and apathogenic *Bacillus anthracis* by real-  
590 time PCR. *FEMS Microbiol Lett*. 2002;214(1):51–9.
- 591 21. Leendertz FH, Ellerbrok H, Boesch C, Couacy-Hymann E, Mätz-Rensing K,  
592 Hakenbeck R, et al. Anthrax kills wild chimpanzees in a tropical rainforest. *Nature*.  
593 2004;430(6998):451–2.
- 594 22. (NBS) NB of S, (OCGS) O of CGSZ. 2012 Population and Housing Census:  
595 Population Distribution by Administrative Units: Key Findings. United Repub  
596 Tanzania. 2013;1–10.
- 597 23. Lembo T, Hampson K, Auty H, Beesley CA, Bessell P, Packer C, et al. Serologic  
598 Surveillance of Anthrax in the Serengeti Ecosystem, Tanzania, 1996–2009. *Emerg*  
599 *Infect Dis J*. 2011;17(3):387.
- 600 24. Turnbull P. Guidelines for the surveillance and control of anthrax in humans and  
601 animals [Internet]. Geneva: WHO, Department of Communicable Diseases  
602 Surveillance and Response; 1998. Available from:  
603 <http://www.ncjrs.gov/app/abstractdb/AbstractDBDetails.aspx?id=192516>

- 604 25. Hui SL, Walter SD. Estimating the Error Rates of Diagnostic Tests. *Biometrics*.  
605 1980;36(1):167.
- 606 26. Ghahramani Z, Jordan MI. Factorial hidden Markov models. *Mach Learn*.  
607 1997;29(2–3):245–73.
- 608 27. Plummer M. JAGS: A program for analysis of Bayesian models using Gibbs  
609 sampling. In: *Proceedings of the 3rd International Workshop on Distributed*  
610 *Statistical Computing*; Vienna, Austria. 2003.
- 611 28. R Core Team. R: A language and environment for statistical computing. R  
612 Foundation for Statistical Computing, Vienna, Austria. URL [http://www.R-](http://www.R-project.org/)  
613 [project.org/](http://www.R-project.org/). 2019.
- 614 29. Denwood MJ. runjags: An R package providing interface utilities, model templates,  
615 parallel computing methods and additional distributions for MCMC models in  
616 JAGS. *J Stat Softw*. 2016;71(9):1–25.
- 617 30. Caraguel CGB, Stryhn H, Gagné N, Dohoo IR, Hammell KL. Selection of a cutoff  
618 value for real-time polymerase chain reaction results to fit a diagnostic purpose:  
619 Analytical and epidemiologic approaches. Vol. 23, *Journal of Veterinary Diagnostic*  
620 *Investigation*. SAGE Publications Inc.; 2011. p. 2–15.
- 621 31. Meredith AL, Cleaveland SC, Denwood MJ, Brown JK, Shaw DJ. *Coxiella burnetii*  
622 (Q-Fever) Seroprevalence in Prey and Predators in the United Kingdom: Evaluation  
623 of Infection in Wild Rodents, Foxes and Domestic Cats Using a Modified ELISA.  
624 *Transbound Emerg Dis*. 2015;62(6):639–49.
- 625 32. Viera AJ, Garrett JM. Understanding interobserver agreement: The kappa statistic.  
626 *Fam Med*. 2005;37(5):360-363.
- 627 33. Gamer M, Lemon J, Fellows I, Singh P. Irr package for R, version 0.84. 2012;  
628 Available from: <https://cran.r-project.org/package=irr>
- 629 34. Muller J, Gwozdz J, Hodgeman R, Ainsworth C, Kluver P, Czarnecki J, et al.  
630 Diagnostic performance characteristics of a rapid field test for anthrax in cattle. *Prev*  
631 *Vet Med*. 2015;54(11):1637–41.



- 632 35. Hoffmann C, Zimmermann F, Biek R, Kuehl H, Nowak K, Mundry R, et al.  
633 Persistent anthrax as a major driver of wildlife mortality in a tropical rainforest.  
634 Nature. 2017;548(7665):82–5.
- 635 36. Douglas MP, Rogers SO. DNA damage caused by common cytological fixatives.  
636 Mutat Res - Fundam Mol Mech Mutagen. 1998;401(1–2):77–88.
- 637 37. Van Ert MN, Easterday WR, Simonson TS, U'Ren JM, Pearson T, Kenefic LJ, et al.  
638 Strain-specific single-nucleotide polymorphism assays for the *Bacillus anthracis*  
639 Ames strain. J Clin Microbiol. 2007 Jan;45(1):47–53.
- 640 38. Byrt T, Bishop J, Carlin JB. Bias, prevalence and kappa. J Clin Epidemiol.  
641 1993;46(5):423–9.
- 642 39. French AS, Zadoks RN, Skuce PJ, Mitchell G, Gordon-Gibbs DK, Craine A, et al.  
643 Prevalence of liver fluke (*Fasciola hepatica*) in wild red deer (*Cervus elaphus*):  
644 Coproantigen elisa is a practicable alternative to faecal egg counting for surveillance  
645 in remote populations. PLoS One. 2016;11(9):e0162420.
- 646
- 647

648 **Supporting information**

649 **S 1 Fig. Chart used to establish presence and strength of *Bacillus anthracis***  
650 **capsule material**

651 **S 2 Fig. Data informing the latent class model**

652 **S 1 Table. Characteristics of the animal carcasses suspected to have died from**  
653 **anthrax, from which samples were collected**

654 **S 2 Table. Comparison of capsule scores obtained with polychrome methylene blue**  
655 **and azure B**

656 **S 3 Table. Primer and probe sequences used in the qPCR reactions, targeting two**  
657 **plasmids and one chromosomal sequence in the *B. anthracis* genome**

658 **S 1 File. Stain preparation and staining procedures**

659 **S 2 File. Inter-observer agreement**

660

a)

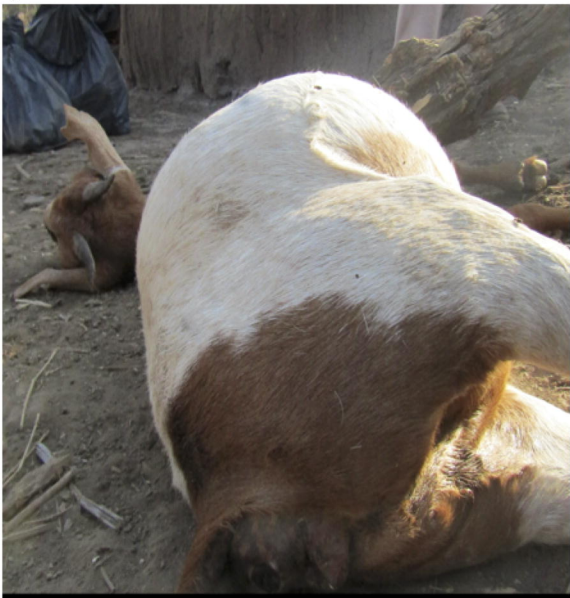

Photo: Rhoda Aminu

b)

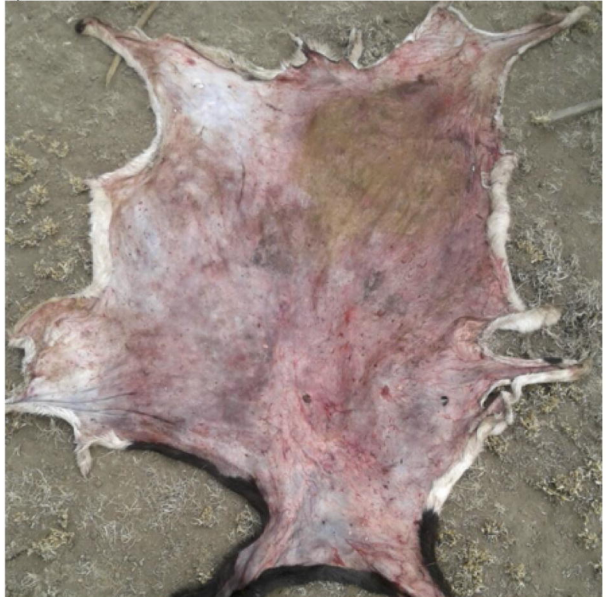

Photo: Sabore Ole Moko

TANZANIA

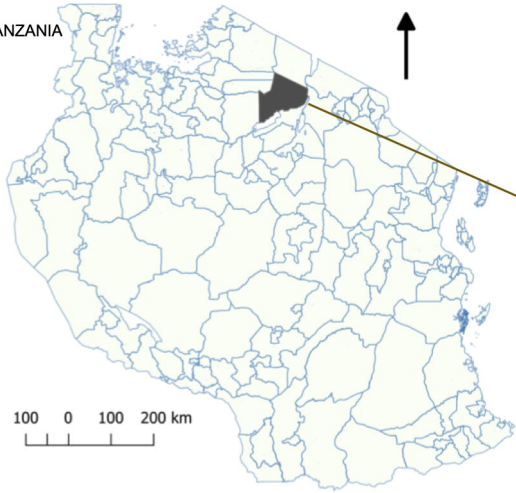

**Ngorongoro Conservation Area**

Human population : >70,084  
Livestock population: ca 860,000

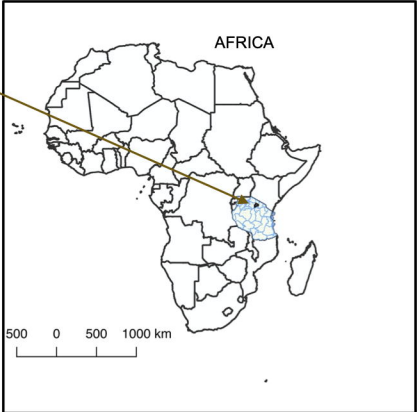

Source: https://www.biorxiv.org/content/10.1101/2020.03.24.004382v1.full.pdf
